# Supplementary material for: TiO2nanotubular arrays decorated with ultrafine Ag nanoseeds enabling a stable and dendrite-free lithium metal anode
Source: Royal Society of Chemistry journal article supplement (doi:10.1039/d2na00526c), 2022-01-01
Supplement: d2na00526c1.pdf [file d2na00526c1.pdf]

# **TiO<sub>2</sub> Nanotubular Arrays Decorated with Ultrafine Ag Nanoseeds**

## **Enabling Stable and Dendrite-free Lithium Metal Anode**

*Yulei Li,<sup>a</sup> Shenhao Li,<sup>a</sup> Jiewu Cui,<sup>a</sup> Jian Yan,<sup>a</sup> Hark Hoe Tan,<sup>b</sup> Jiaqin LIU,<sup>\*a</sup> Yucheng Wu<sup>\*a</sup>*

<sup>a</sup> Institute of Industry & Equipment Technology, School of Materials Science and Engineering, Engineering Research Center of Advanced Composite Materials Design & Application of Anhui Province, Key Laboratory of Advanced Functional Materials & Devices of Anhui Province, Hefei University of Technology, Hefei, 230009, China

<sup>b</sup> Department of Electronic Materials Engineering, Research School of Physics and Engineering, Australian National University, Canberra, ACT 2601, Australia

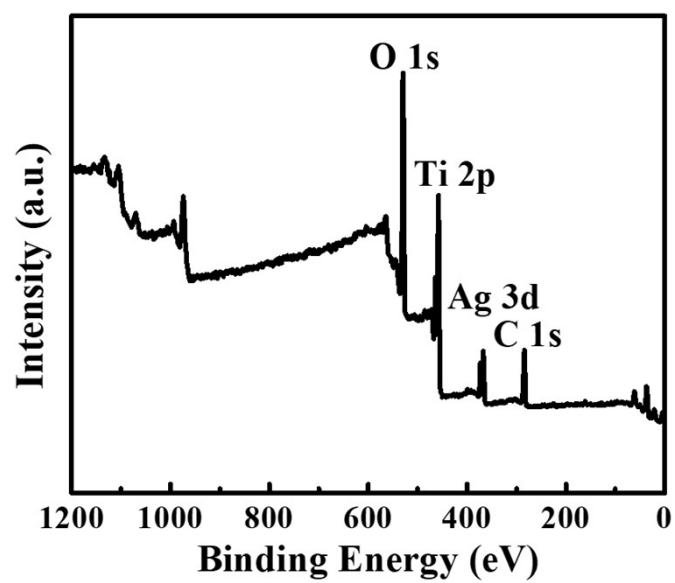

**Fig.S1** XPS spectrum of Ag@TNTAs/Ti

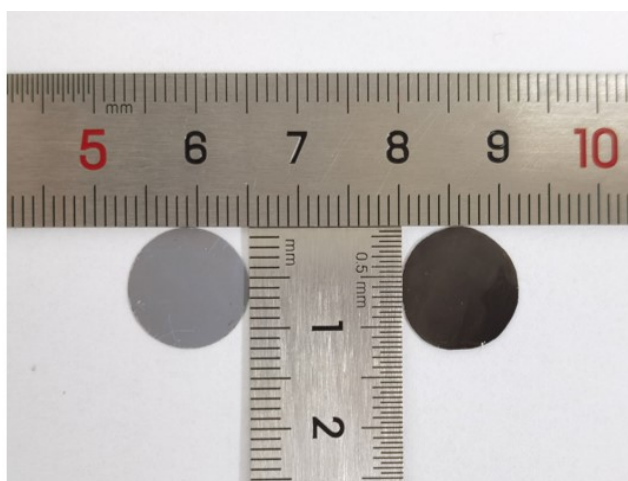

**Fig.S2** Photographs of TNTAs/Ti (left) and Ag@TNTAs/Ti (right).

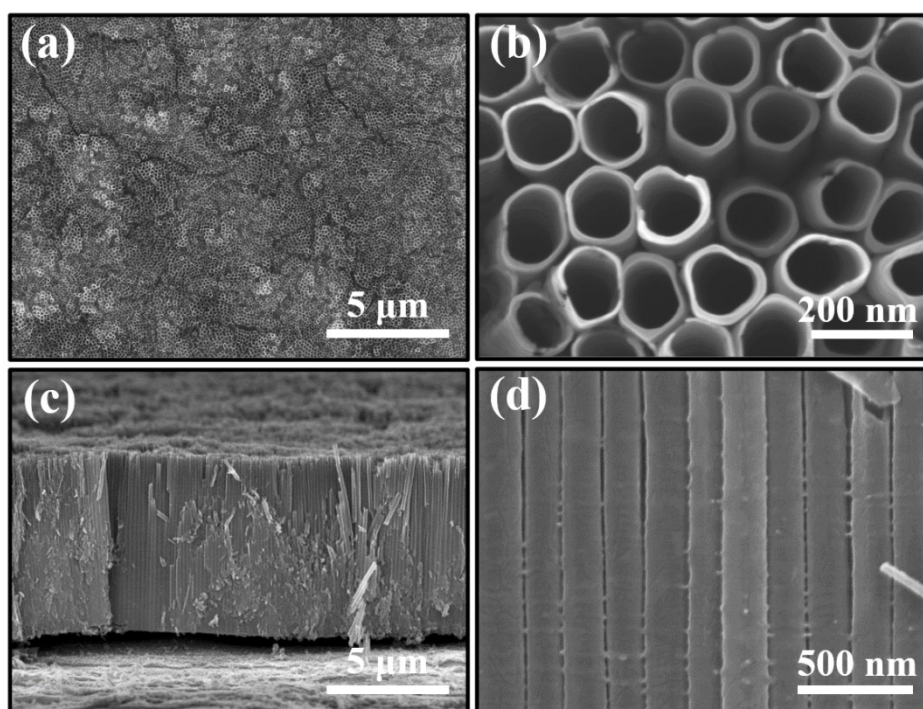

**Fig.S3** SEM images of TNTAs/Ti.

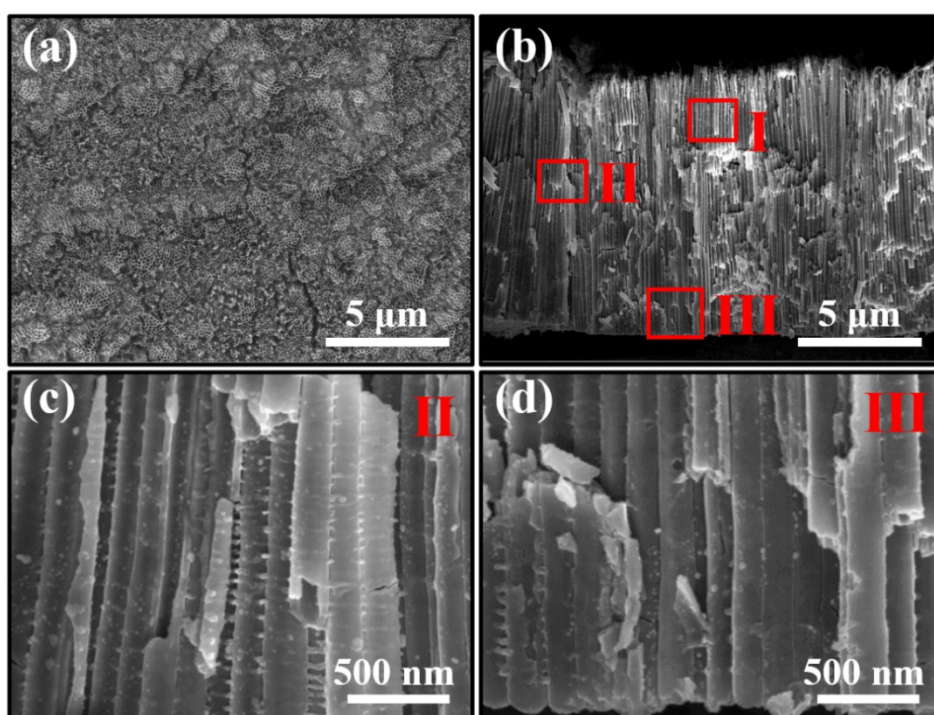

**Fig.S4** (a) Top and (b-d) side view SEM images of Ag@TNTAs/Ti.

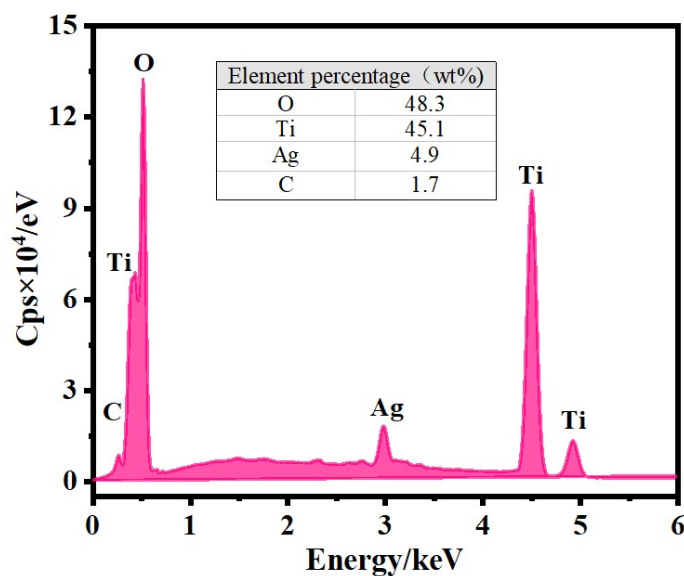

**Fig.S5** EDX spectrum of Ag@TNTAs/Ti.

(Note: During the preparation of TNTAs/Ti by anodization, a small amount of ethylene glycol (EG) remains on the surface of TiO<sub>2</sub> nanotubes in the as-prepared TNTAs/Ti even after repeated rinsing with ethyl alcohol and water, and then, the EG is converted to carbon-contained species during subsequent annealing. So, a weak peak assigned to C element appears in the spectrum of Ag@TNTAs/Ti.)

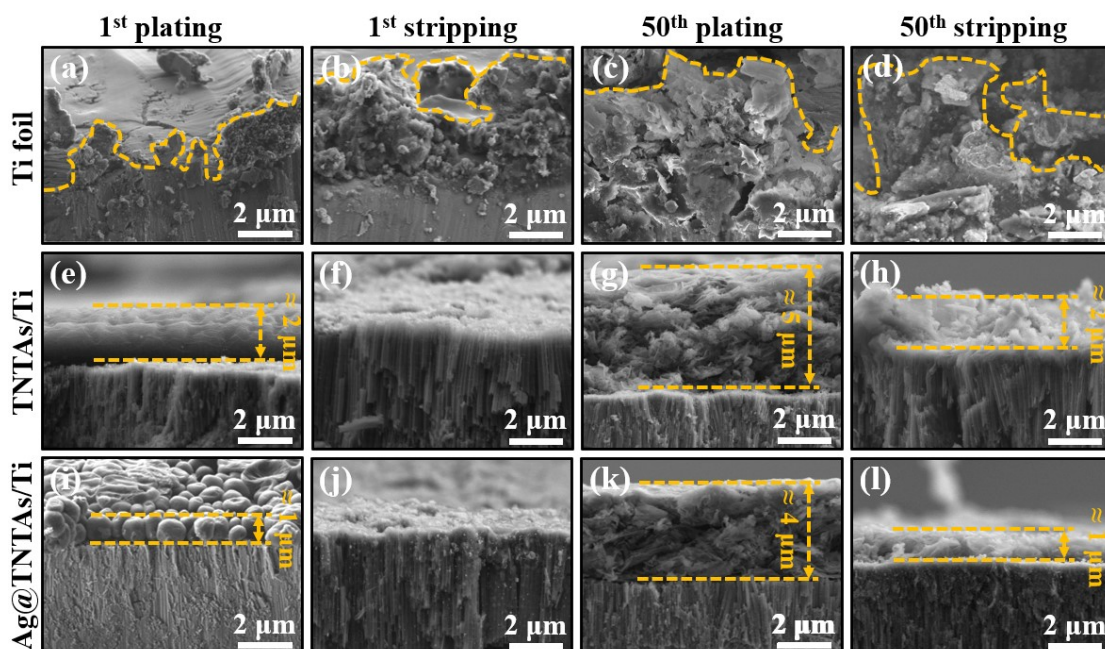

**Fig.S6** The deposited Li morphological evolution (side-view) on (a-d) bare Ti foil, (e-h) TNTAs/Ti and (i-l) Ag@TNTAs/Ti substrates at 1 mA cm<sup>-2</sup> with a capacity of 1 mAh cm<sup>-2</sup> at 1st and 50th cycle.

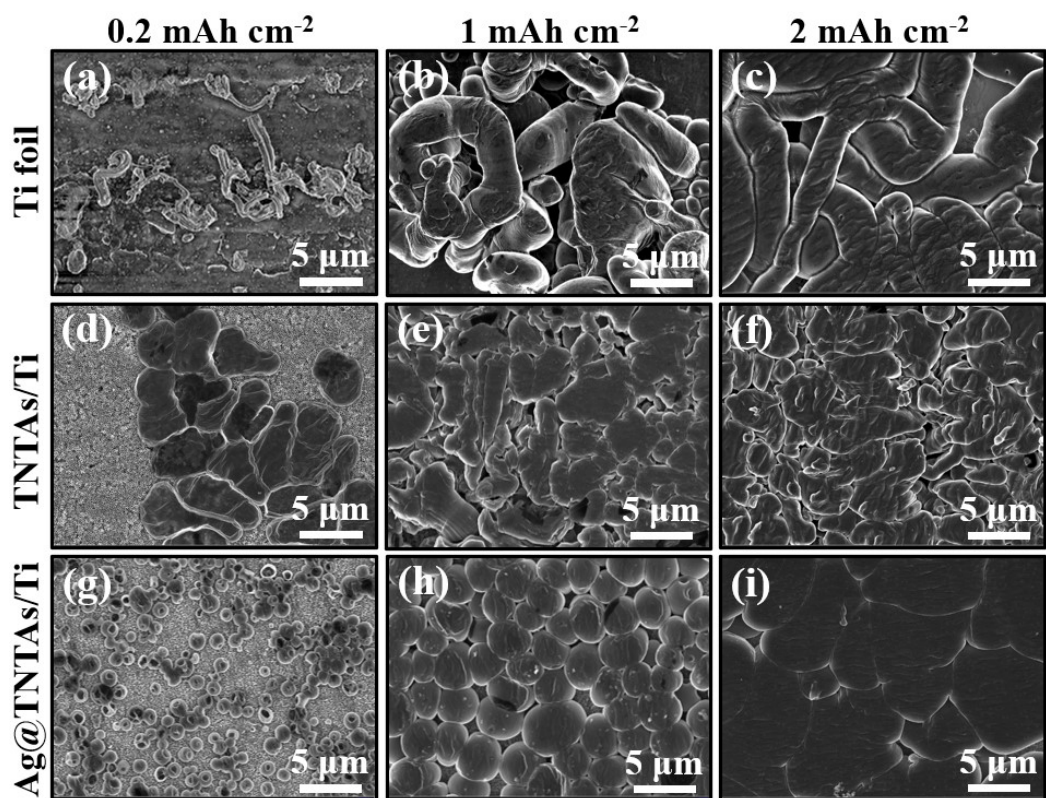

**Fig.S7** Top-view SEM images of Ti (a-c), TNTAs/Ti (d-f) and Ag@TNTAs/Ti (g-i): after plating 0.2 mAh cm<sup>-2</sup> (a, d, g), 1 mAh cm<sup>-2</sup> (b, e, h) and 2 mAh cm<sup>-2</sup> (c, f, i) at 1 mA cm<sup>-2</sup>.

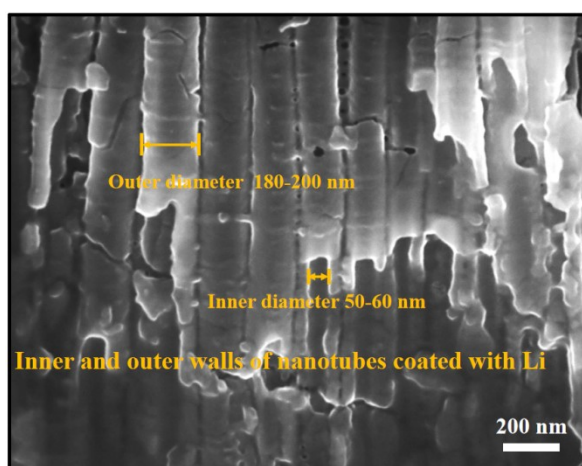

**Fig.S8** Side-view SEM image of Ag@TNTAs/Ti after plating 0.2 mAh cm<sup>-2</sup> at 1 mA cm<sup>-2</sup>.

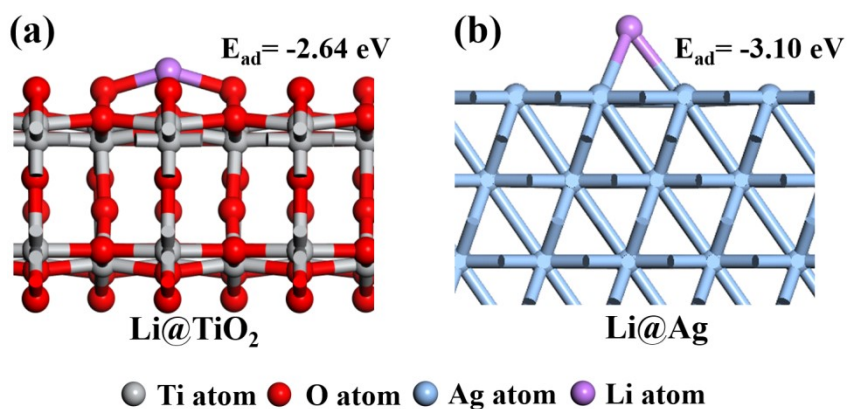

**Fig.S9** DFT calculations of the adsorption configurations and adsorption energies of Li atom on (a) TiO<sub>2</sub> and (b) Ag surfaces.

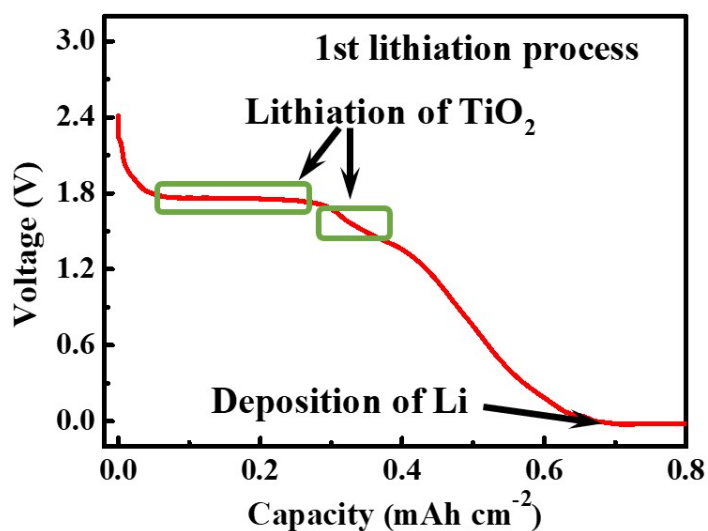

**Fig.S10** Voltage profile of initial Li plating on TNTAs/Ti substrate at a current density of 0.5 mA cm<sup>-2</sup>.

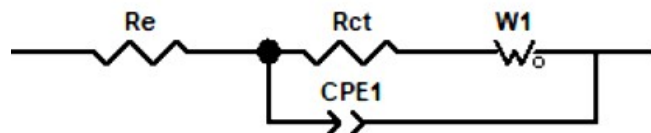

**Fig.S11** The corresponding equivalent circuits of Ti|Li, TNTAs/Ti|Li and Ag@TNTAs/Ti|Li symmetric cells.

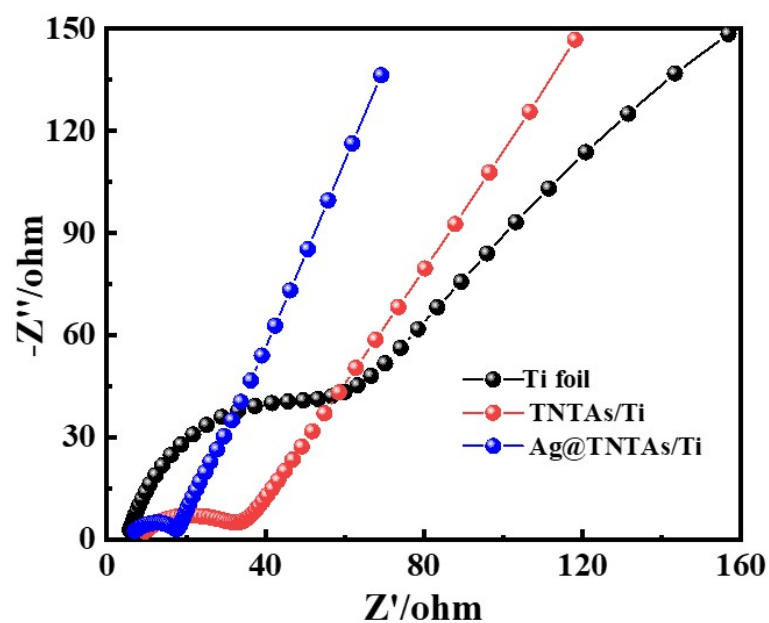

**Fig.S12** The electrochemical impedance spectra (EIS) of Ti|Li, TNTAs/Ti|Li and Ag@TNTAs/Ti|Li symmetric cells at 1 mA cm<sup>-2</sup> after 50 cycles.

**Table S1** The fitted data of electrochemical impedance spectra for Ti|Li, TNTAs/Ti|Li and Ag@TNTAs/Ti|Li symmetric cells.

| 50th cycle      | Ti   | TNTAs/Ti | Ag@TNTAs/Ti |
|-----------------|------|----------|-------------|
| $R_{ct}/\Omega$ | 73.1 | 34.7     | 9.6         |
